# Supplementary material for: Microplastics Dynamics in the Bathing Seawater Affected by the Ebb Tide in Zhanjiang Bay, China
Source: MDPI journal article supplement (doi:10.3390/jmse10121947), 2022-12-08
Supplement: s1 [file s1]

**Table S1.** Information of each station of different tides.

| Stations | Tide        | Latitude  | Longitude  | Sampling volume(L) |
|----------|-------------|-----------|------------|--------------------|
| A1       | High tide   | 21°13'8"  | 110°25'16" | 50                 |
| A2       | Middle tide | 21°13'8"  | 110°25'17" | 50                 |
| A3       | Low tide    | 21°13'8"  | 110°25'18" | 50                 |
| B1       | High tide   | 21°13'11" | 110°25'17" | 50                 |
| B2       | Middle tide | 21°13'11" | 110°25'18" | 50                 |
| B3       | Low tide    | 21°13'11" | 110°25'19" | 50                 |
| C1       | High tide   | 21°13'14" | 110°25'18' | 50                 |
| C2       | Middle tide | 21°13'14" | 110°25'19" | 50                 |
| C3       | Low tide    | 21°13'14" | 110°25'20" | 50                 |
| D1       | High tide   | 21°13'17" | 110°25'19" | 50                 |
| D2       | Middle tide | 21°13'17" | 110°25'20" | 50                 |
| D3       | Low tide    | 21°13'17" | 110°25'21" | 50                 |
| E1       | High tide   | 21°13'21" | 110°25'20" | 50                 |
| E2       | Middle tide | 21°13'21" | 110°25'21" | 50                 |
| E3       | Low tide    | 21°13'21" | 110°25'22" | 50                 |

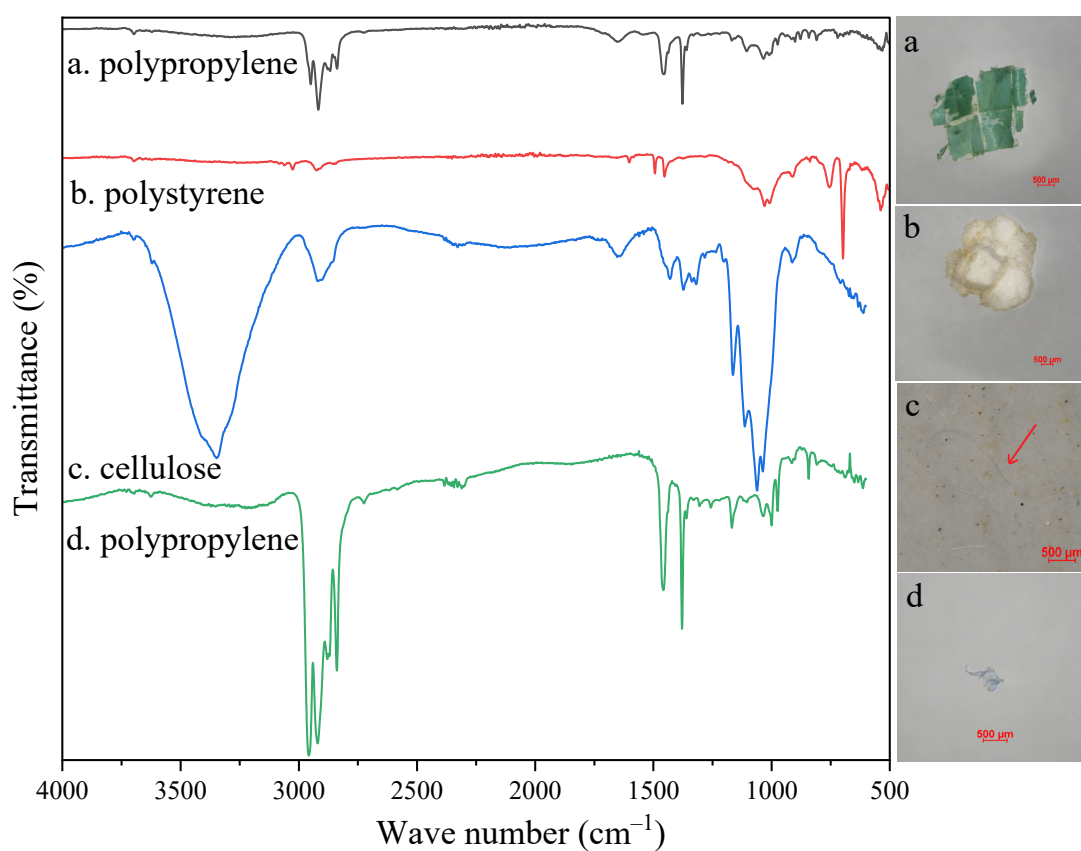

**Figure S1.** Typical identified MPs and their compositions. Green fragment — polypropylene (a), white foam — polystyrene (b), transparent fiber — cellulose (c), and blue film — polypropylene (d).
